# Supplementary material for: Implementation of generative AI for the assessment and treatment of autism spectrum disorders: a scoping review
Source: Front Psychiatry. 2025 Jul 22;16:1628216. doi: 10.3389/fpsyt.2025.1628216 (PMC12322814; doi:10.3389/fpsyt.2025.1628216)
Supplement: Supplementary file 2 [file Table1.xlsx]

## Sheet: Deng et al.
Category of study designs	Methodological quality criteria	Responses
		Yes	No	Can’t tell	Comments
Screening questions (for all types)	S1. Are there clear research questions?	o
	S2. Do the collected data allow to address the research questions?	o
	Further appraisal may not be feasible or appropriate when the answer is ‘No’ or ‘Can’t tell’ to one or both screening questions.
1. Qualitative	1.1. Is the qualitative approach appropriate to answer the research question?
	1.2. Are the qualitative data collection methods adequate to address the research question?
	1.3. Are the findings adequately derived from the data?
	1.4. Is the interpretation of results sufficiently substantiated by data?
	1.5. Is there coherence between qualitative data sources, collection, analysis and interpretation?
2. Quantitative randomized controlled trials	2.1. Is randomization appropriately performed?
	2.2. Are the groups comparable at baseline?
	2.3. Are there complete outcome data?
	2.4. Are outcome assessors blinded to the intervention provided?
	2.5 Did the participants adhere to the assigned intervention?
3. Quantitative non-randomized	3.1. Are the participants representative of the target population?		o		Samples from two paris clinics and local schools; limited size and geography may not represent ASD population.
	3.2. Are measurements appropriate regarding both the outcome and intervention (or exposure)?	o
	3.3. Are there complete outcome data?	o
	3.4. Are the confounders accounted for in the design and analysis?		o		Age/sex matching mentioned, but no statistical adjustment for potential confounders reported.
	3.5. During the study period, is the intervention administered (or exposure occurred) as intended?	o
4. Quantitative descriptive	4.1. Is the sampling strategy relevant to address the research question?
	4.2. Is the sample representative of the target population?
	4.3. Are the measurements appropriate?
	4.4. Is the risk of nonresponse bias low?
	4.5. Is the statistical analysis appropriate to answer the research question?
5. Mixed methods	5.1. Is there an adequate rationale for using a mixed methods design to address the research question?
	5.2. Are the different components of the study effectively integrated to answer the research question?
	5.3. Are the outputs of the integration of qualitative and quantitative components adequately interpreted?
	5.4. Are divergences and inconsistencies between quantitative and qualitative results adequately addressed?
	5.5. Do the different components of the study adhere to the quality criteria of each tradition of the methods involved?

## Sheet: He et al.
Category of study designs	Methodological quality criteria	Responses
		Yes	No	Can’t tell	Comments
Screening questions (for all types)	S1. Are there clear research questions?	o
	S2. Do the collected data allow to address the research questions?	o
	Further appraisal may not be feasible or appropriate when the answer is ‘No’ or ‘Can’t tell’ to one or both screening questions.
1. Qualitative	1.1. Is the qualitative approach appropriate to answer the research question?
	1.2. Are the qualitative data collection methods adequate to address the research question?
	1.3. Are the findings adequately derived from the data?
	1.4. Is the interpretation of results sufficiently substantiated by data?
	1.5. Is there coherence between qualitative data sources, collection, analysis and interpretation?
2. Quantitative randomized controlled trials	2.1. Is randomization appropriately performed?
	2.2. Are the groups comparable at baseline?
	2.3. Are there complete outcome data?
	2.4. Are outcome assessors blinded to the intervention provided?
	2.5 Did the participants adhere to the assigned intervention?
3. Quantitative non-randomized	3.1. Are the participants representative of the target population?		o		The sample is a set of 100 autistic patients who posted on one online platform (DXY); demographics, socioeconomic status, and geographic diversity are not reported, so generalisability to all Chinese autistic patients is doubtful.
	3.2. Are measurements appropriate regarding both the outcome and intervention (or exposure)?	o
	3.3. Are there complete outcome data?	o
	3.4. Are the confounders accounted for in the design and analysis?			o	Questions varied in topic and complexity, but no stratification or statistical adjustment for these potential confounders is presented beyond randomising answer order; insufficient information to judge full control of confounding.
	3.5. During the study period, is the intervention administered (or exposure occurred) as intended?	o
4. Quantitative descriptive	4.1. Is the sampling strategy relevant to address the research question?
	4.2. Is the sample representative of the target population?
	4.3. Are the measurements appropriate?
	4.4. Is the risk of nonresponse bias low?
	4.5. Is the statistical analysis appropriate to answer the research question?
5. Mixed methods	5.1. Is there an adequate rationale for using a mixed methods design to address the research question?
	5.2. Are the different components of the study effectively integrated to answer the research question?
	5.3. Are the outputs of the integration of qualitative and quantitative components adequately interpreted?
	5.4. Are divergences and inconsistencies between quantitative and qualitative results adequately addressed?
	5.5. Do the different components of the study adhere to the quality criteria of each tradition of the methods involved?

## Sheet: Koegel et al.
Category of study designs	Methodological quality criteria	Responses
		Yes	No	Can’t tell	Comments
Screening questions (for all types)	S1. Are there clear research questions?	o
	S2. Do the collected data allow to address the research questions?	o
	Further appraisal may not be feasible or appropriate when the answer is ‘No’ or ‘Can’t tell’ to one or both screening questions.
1. Qualitative	1.1. Is the qualitative approach appropriate to answer the research question?
	1.2. Are the qualitative data collection methods adequate to address the research question?
	1.3. Are the findings adequately derived from the data?
	1.4. Is the interpretation of results sufficiently substantiated by data?
	1.5. Is there coherence between qualitative data sources, collection, analysis and interpretation?
2. Quantitative randomized controlled trials	2.1. Is randomization appropriately performed?	o
	2.2. Are the groups comparable at baseline?	o
	2.3. Are there complete outcome data?	o
	2.4. Are outcome assessors blinded to the intervention provided?	o
	2.5 Did the participants adhere to the assigned intervention?	o
3. Quantitative non-randomized	3.1. Are the participants representative of the target population?
	3.2. Are measurements appropriate regarding both the outcome and intervention (or exposure)?
	3.3. Are there complete outcome data?
	3.4. Are the confounders accounted for in the design and analysis?
	3.5. During the study period, is the intervention administered (or exposure occurred) as intended?
4. Quantitative descriptive	4.1. Is the sampling strategy relevant to address the research question?
	4.2. Is the sample representative of the target population?
	4.3. Are the measurements appropriate?
	4.4. Is the risk of nonresponse bias low?
	4.5. Is the statistical analysis appropriate to answer the research question?
5. Mixed methods	5.1. Is there an adequate rationale for using a mixed methods design to address the research question?
	5.2. Are the different components of the study effectively integrated to answer the research question?
	5.3. Are the outputs of the integration of qualitative and quantitative components adequately interpreted?
	5.4. Are divergences and inconsistencies between quantitative and qualitative results adequately addressed?
	5.5. Do the different components of the study adhere to the quality criteria of each tradition of the methods involved?

## Sheet: Kurian et al.
Category of study designs	Methodological quality criteria	Responses
		Yes	No	Can’t tell	Comments
Screening questions (for all types)	S1. Are there clear research questions?	o
	S2. Do the collected data allow to address the research questions?	o
	Further appraisal may not be feasible or appropriate when the answer is ‘No’ or ‘Can’t tell’ to one or both screening questions.
1. Qualitative	1.1. Is the qualitative approach appropriate to answer the research question?
	1.2. Are the qualitative data collection methods adequate to address the research question?
	1.3. Are the findings adequately derived from the data?
	1.4. Is the interpretation of results sufficiently substantiated by data?
	1.5. Is there coherence between qualitative data sources, collection, analysis and interpretation?
2. Quantitative randomized controlled trials	2.1. Is randomization appropriately performed?
	2.2. Are the groups comparable at baseline?
	2.3. Are there complete outcome data?
	2.4. Are outcome assessors blinded to the intervention provided?
	2.5 Did the participants adhere to the assigned intervention?
3. Quantitative non-randomized	3.1. Are the participants representative of the target population?		o		Data came from 75 children in one public video dataset plus ad-hoc YouTube clips; demographics and cultural spread are limited, so findings may not generalise to the wider ASD population.
	3.2. Are measurements appropriate regarding both the outcome and intervention (or exposure)?	o
	3.3. Are there complete outcome data?	o
	3.4. Are the confounders accounted for in the design and analysis?			o	The authors note small, non-diverse datasets and acknowledge limited generalisability, but they do not model or adjust for potential confounders such as age or gender.
	3.5. During the study period, is the intervention administered (or exposure occurred) as intended?	o
4. Quantitative descriptive	4.1. Is the sampling strategy relevant to address the research question?
	4.2. Is the sample representative of the target population?
	4.3. Are the measurements appropriate?
	4.4. Is the risk of nonresponse bias low?
	4.5. Is the statistical analysis appropriate to answer the research question?
5. Mixed methods	5.1. Is there an adequate rationale for using a mixed methods design to address the research question?
	5.2. Are the different components of the study effectively integrated to answer the research question?
	5.3. Are the outputs of the integration of qualitative and quantitative components adequately interpreted?
	5.4. Are divergences and inconsistencies between quantitative and qualitative results adequately addressed?
	5.5. Do the different components of the study adhere to the quality criteria of each tradition of the methods involved?

## Sheet: Lyu et al.
Category of study designs	Methodological quality criteria	Responses
		Yes	No	Can’t tell	Comments
Screening questions (for all types)	S1. Are there clear research questions?	o
	S2. Do the collected data allow to address the research questions?	o
	Further appraisal may not be feasible or appropriate when the answer is ‘No’ or ‘Can’t tell’ to one or both screening questions.
1. Qualitative	1.1. Is the qualitative approach appropriate to answer the research question?
	1.2. Are the qualitative data collection methods adequate to address the research question?
	1.3. Are the findings adequately derived from the data?
	1.4. Is the interpretation of results sufficiently substantiated by data?
	1.5. Is there coherence between qualitative data sources, collection, analysis and interpretation?
2. Quantitative randomized controlled trials	2.1. Is randomization appropriately performed?			o	Children were “randomly assigned” to EMooly or baseline slides, but the paper does not describe the sequence-generation or allocation-concealment method.
	2.2. Are the groups comparable at baseline?			o	The article gives overall sample demographics (mean age 6 y; 3 girls/21 boys) but does not present a side-by-side table of baseline characteristics or pre-test scores for the two groups, so comparability cannot be judged.
	2.3. Are there complete outcome data?			o	All 24 children appear to have finished the single-session intervention and post-quiz, yet no explicit statement on drop-outs or missing data is provided.
	2.4. Are outcome assessors blinded to the intervention provided?			o	Quizzes were administered within the session and questionnaires by caregivers; the paper does not mention blinding of those collecting or scoring outcomes.
	2.5 Did the participants adhere to the assigned intervention?	o
3. Quantitative non-randomized	3.1. Are the participants representative of the target population?
	3.2. Are measurements appropriate regarding both the outcome and intervention (or exposure)?
	3.3. Are there complete outcome data?
	3.4. Are the confounders accounted for in the design and analysis?
	3.5. During the study period, is the intervention administered (or exposure occurred) as intended?
4. Quantitative descriptive	4.1. Is the sampling strategy relevant to address the research question?
	4.2. Is the sample representative of the target population?
	4.3. Are the measurements appropriate?
	4.4. Is the risk of nonresponse bias low?
	4.5. Is the statistical analysis appropriate to answer the research question?
5. Mixed methods	5.1. Is there an adequate rationale for using a mixed methods design to address the research question?
	5.2. Are the different components of the study effectively integrated to answer the research question?
	5.3. Are the outputs of the integration of qualitative and quantitative components adequately interpreted?
	5.4. Are divergences and inconsistencies between quantitative and qualitative results adequately addressed?
	5.5. Do the different components of the study adhere to the quality criteria of each tradition of the methods involved?

## Sheet: Mukherjee et al.
Category of study designs	Methodological quality criteria	Responses
		Yes	No	Can’t tell	Comments
Screening questions (for all types)	S1. Are there clear research questions?	o
	S2. Do the collected data allow to address the research questions?	o
	Further appraisal may not be feasible or appropriate when the answer is ‘No’ or ‘Can’t tell’ to one or both screening questions.
1. Qualitative	1.1. Is the qualitative approach appropriate to answer the research question?
	1.2. Are the qualitative data collection methods adequate to address the research question?
	1.3. Are the findings adequately derived from the data?
	1.4. Is the interpretation of results sufficiently substantiated by data?
	1.5. Is there coherence between qualitative data sources, collection, analysis and interpretation?
2. Quantitative randomized controlled trials	2.1. Is randomization appropriately performed?
	2.2. Are the groups comparable at baseline?
	2.3. Are there complete outcome data?
	2.4. Are outcome assessors blinded to the intervention provided?
	2.5 Did the participants adhere to the assigned intervention?
3. Quantitative non-randomized	3.1. Are the participants representative of the target population?			o	Dialogues were gathered from “various social networks and organizations where children with special needs receive therapies”. The paper provides no demographic or geographic breakdown of those groups, so the degree to which this convenience sample mirrors the broader parent population remains unclear.
	3.2. Are measurements appropriate regarding both the outcome and intervention (or exposure)?	o
	3.3. Are there complete outcome data?	o
	3.4. Are the confounders accounted for in the design and analysis?			o	Possible confounders are not reported or adjusted for.
	3.5. During the study period, is the intervention administered (or exposure occurred) as intended?	o
4. Quantitative descriptive	4.1. Is the sampling strategy relevant to address the research question?
	4.2. Is the sample representative of the target population?
	4.3. Are the measurements appropriate?
	4.4. Is the risk of nonresponse bias low?
	4.5. Is the statistical analysis appropriate to answer the research question?
5. Mixed methods	5.1. Is there an adequate rationale for using a mixed methods design to address the research question?
	5.2. Are the different components of the study effectively integrated to answer the research question?
	5.3. Are the outputs of the integration of qualitative and quantitative components adequately interpreted?
	5.4. Are divergences and inconsistencies between quantitative and qualitative results adequately addressed?
	5.5. Do the different components of the study adhere to the quality criteria of each tradition of the methods involved?

## Sheet: She et al.
Category of study designs	Methodological quality criteria	Responses
		Yes	No	Can’t tell	Comments
Screening questions (for all types)	S1. Are there clear research questions?	o
	S2. Do the collected data allow to address the research questions?	o
	Further appraisal may not be feasible or appropriate when the answer is ‘No’ or ‘Can’t tell’ to one or both screening questions.
1. Qualitative	1.1. Is the qualitative approach appropriate to answer the research question?
	1.2. Are the qualitative data collection methods adequate to address the research question?
	1.3. Are the findings adequately derived from the data?
	1.4. Is the interpretation of results sufficiently substantiated by data?
	1.5. Is there coherence between qualitative data sources, collection, analysis and interpretation?
2. Quantitative randomized controlled trials	2.1. Is randomization appropriately performed?
	2.2. Are the groups comparable at baseline?
	2.3. Are there complete outcome data?
	2.4. Are outcome assessors blinded to the intervention provided?
	2.5 Did the participants adhere to the assigned intervention?
3. Quantitative non-randomized	3.1. Are the participants representative of the target population?
	3.2. Are measurements appropriate regarding both the outcome and intervention (or exposure)?
	3.3. Are there complete outcome data?
	3.4. Are the confounders accounted for in the design and analysis?
	3.5. During the study period, is the intervention administered (or exposure occurred) as intended?
4. Quantitative descriptive	4.1. Is the sampling strategy relevant to address the research question?	o
	4.2. Is the sample representative of the target population?		o		Corpora come from a mix of publicly available datasets and therapy-organisation recordings; demographic breadth or cultural diversity is not reported, so representativeness of all autistic-child interactions is doubtful .
	4.3. Are the measurements appropriate?	o
	4.4. Is the risk of nonresponse bias low?	o
	4.5. Is the statistical analysis appropriate to answer the research question?	o
5. Mixed methods	5.1. Is there an adequate rationale for using a mixed methods design to address the research question?
	5.2. Are the different components of the study effectively integrated to answer the research question?
	5.3. Are the outputs of the integration of qualitative and quantitative components adequately interpreted?
	5.4. Are divergences and inconsistencies between quantitative and qualitative results adequately addressed?
	5.5. Do the different components of the study adhere to the quality criteria of each tradition of the methods involved?

## Sheet: Tang et al.
Category of study designs	Methodological quality criteria	Responses
		Yes	No	Can’t tell	Comments
Screening questions (for all types)	S1. Are there clear research questions?	o
	S2. Do the collected data allow to address the research questions?	o
	Further appraisal may not be feasible or appropriate when the answer is ‘No’ or ‘Can’t tell’ to one or both screening questions.
1. Qualitative	1.1. Is the qualitative approach appropriate to answer the research question?
	1.2. Are the qualitative data collection methods adequate to address the research question?
	1.3. Are the findings adequately derived from the data?
	1.4. Is the interpretation of results sufficiently substantiated by data?
	1.5. Is there coherence between qualitative data sources, collection, analysis and interpretation?
2. Quantitative randomized controlled trials	2.1. Is randomization appropriately performed?
	2.2. Are the groups comparable at baseline?
	2.3. Are there complete outcome data?
	2.4. Are outcome assessors blinded to the intervention provided?
	2.5 Did the participants adhere to the assigned intervention?
3. Quantitative non-randomized	3.1. Are the participants representative of the target population?
	3.2. Are measurements appropriate regarding both the outcome and intervention (or exposure)?
	3.3. Are there complete outcome data?
	3.4. Are the confounders accounted for in the design and analysis?
	3.5. During the study period, is the intervention administered (or exposure occurred) as intended?
4. Quantitative descriptive	4.1. Is the sampling strategy relevant to address the research question?	o
	4.2. Is the sample representative of the target population?		o		Final sample = 6 HFA children from one institute after 4/10 drop-outs; limited size, single setting and male predominance (5/6) undermine generalisability.
	4.3. Are the measurements appropriate?	o
	4.4. Is the risk of nonresponse bias low?		o		40 % attrition (4 of 10 children withdrew) and absence of comparison between completers and drop-outs raise substantial non-response bias concerns.
	4.5. Is the statistical analysis appropriate to answer the research question?	o
5. Mixed methods	5.1. Is there an adequate rationale for using a mixed methods design to address the research question?
	5.2. Are the different components of the study effectively integrated to answer the research question?
	5.3. Are the outputs of the integration of qualitative and quantitative components adequately interpreted?
	5.4. Are divergences and inconsistencies between quantitative and qualitative results adequately addressed?
	5.5. Do the different components of the study adhere to the quality criteria of each tradition of the methods involved?

## Sheet: Woolsey et al.
Category of study designs	Methodological quality criteria	Responses
		Yes	No	Can’t tell	Comments
Screening questions (for all types)	S1. Are there clear research questions?	o
	S2. Do the collected data allow to address the research questions?	o
	Further appraisal may not be feasible or appropriate when the answer is ‘No’ or ‘Can’t tell’ to one or both screening questions.
1. Qualitative	1.1. Is the qualitative approach appropriate to answer the research question?
	1.2. Are the qualitative data collection methods adequate to address the research question?
	1.3. Are the findings adequately derived from the data?
	1.4. Is the interpretation of results sufficiently substantiated by data?
	1.5. Is there coherence between qualitative data sources, collection, analysis and interpretation?
2. Quantitative randomized controlled trials	2.1. Is randomization appropriately performed?
	2.2. Are the groups comparable at baseline?
	2.3. Are there complete outcome data?
	2.4. Are outcome assessors blinded to the intervention provided?
	2.5 Did the participants adhere to the assigned intervention?
3. Quantitative non-randomized	3.1. Are the participants representative of the target population?
	3.2. Are measurements appropriate regarding both the outcome and intervention (or exposure)?
	3.3. Are there complete outcome data?
	3.4. Are the confounders accounted for in the design and analysis?
	3.5. During the study period, is the intervention administered (or exposure occurred) as intended?
4. Quantitative descriptive	4.1. Is the sampling strategy relevant to address the research question?	o
	4.2. Is the sample representative of the target population?		o		Real-world baseline data come solely from Arizona CDC surveillance notes, and synthetic data are LLM-generated; neither necessarily represents broader clinical language or geographic diversity.
	4.3. Are the measurements appropriate?	o
	4.4. Is the risk of nonresponse bias low?	o
	4.5. Is the statistical analysis appropriate to answer the research question?	o
5. Mixed methods	5.1. Is there an adequate rationale for using a mixed methods design to address the research question?
	5.2. Are the different components of the study effectively integrated to answer the research question?
	5.3. Are the outputs of the integration of qualitative and quantitative components adequately interpreted?
	5.4. Are divergences and inconsistencies between quantitative and qualitative results adequately addressed?
	5.5. Do the different components of the study adhere to the quality criteria of each tradition of the methods involved?

## Sheet: Zhao et al.
Category of study designs	Methodological quality criteria	Responses
		Yes	No	Can’t tell	Comments
Screening questions (for all types)	S1. Are there clear research questions?	o
	S2. Do the collected data allow to address the research questions?	o
	Further appraisal may not be feasible or appropriate when the answer is ‘No’ or ‘Can’t tell’ to one or both screening questions.
1. Qualitative	1.1. Is the qualitative approach appropriate to answer the research question?
	1.2. Are the qualitative data collection methods adequate to address the research question?
	1.3. Are the findings adequately derived from the data?
	1.4. Is the interpretation of results sufficiently substantiated by data?
	1.5. Is there coherence between qualitative data sources, collection, analysis and interpretation?
2. Quantitative randomized controlled trials	2.1. Is randomization appropriately performed?
	2.2. Are the groups comparable at baseline?
	2.3. Are there complete outcome data?
	2.4. Are outcome assessors blinded to the intervention provided?
	2.5 Did the participants adhere to the assigned intervention?
3. Quantitative non-randomized	3.1. Are the participants representative of the target population?			o	Families were recruited through a volunteer registry, but the paper gives only limited demographic information (age distribution, sex ratio) and no description of the sampling frame’s geographic or socioeconomic diversity.
	3.2. Are measurements appropriate regarding both the outcome and intervention (or exposure)?	o
	3.3. Are there complete outcome data?	o
	3.4. Are the confounders accounted for in the design and analysis?			o	Training/validation split was by participant to prevent leakage, but no statistical adjustment for demographic factors (age, sex) or task context is reported; impact of these potential confounders is unclear.
	3.5. During the study period, is the intervention administered (or exposure occurred) as intended?	o
4. Quantitative descriptive	4.1. Is the sampling strategy relevant to address the research question?
	4.2. Is the sample representative of the target population?
	4.3. Are the measurements appropriate?
	4.4. Is the risk of nonresponse bias low?
	4.5. Is the statistical analysis appropriate to answer the research question?
5. Mixed methods	5.1. Is there an adequate rationale for using a mixed methods design to address the research question?
	5.2. Are the different components of the study effectively integrated to answer the research question?
	5.3. Are the outputs of the integration of qualitative and quantitative components adequately interpreted?
	5.4. Are divergences and inconsistencies between quantitative and qualitative results adequately addressed?
	5.5. Do the different components of the study adhere to the quality criteria of each tradition of the methods involved?
